# Supplementary figures and images for: Lipid–protein interactions in double-layered two-dimensional AQP0 crystals
Source: Springer Nature journal article supplement (doi:10.1038/nature04321), 2005-11-30

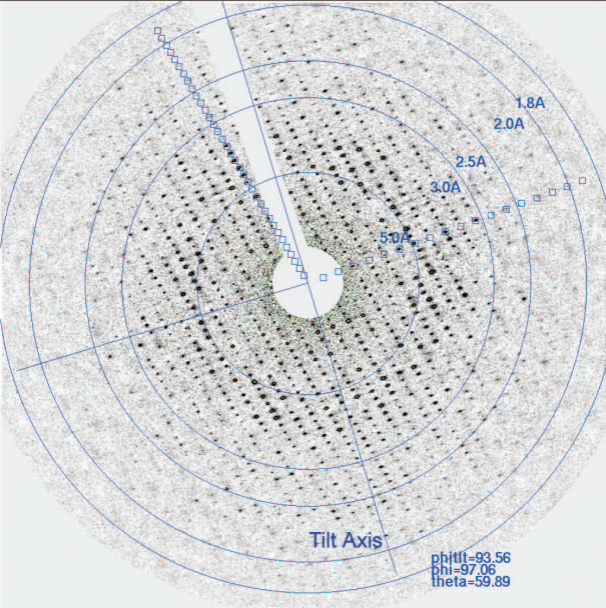

Supplement: 41586_2005_BFnature04321_MOESM2_ESM.pdf [file 41586_2005_BFnature04321_MOESM2_ESM.pdf]

**a**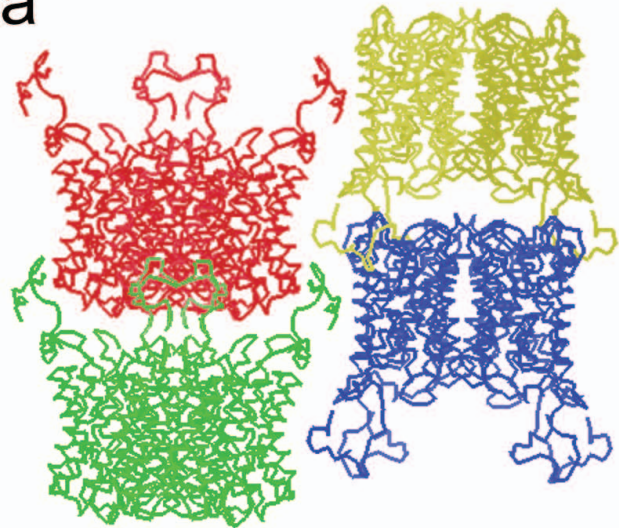**b**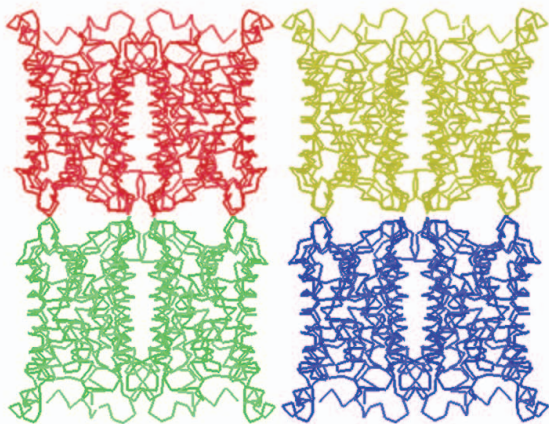

Supplement: 41586_2005_BFnature04321_MOESM3_ESM.pdf [file 41586_2005_BFnature04321_MOESM3_ESM.pdf]

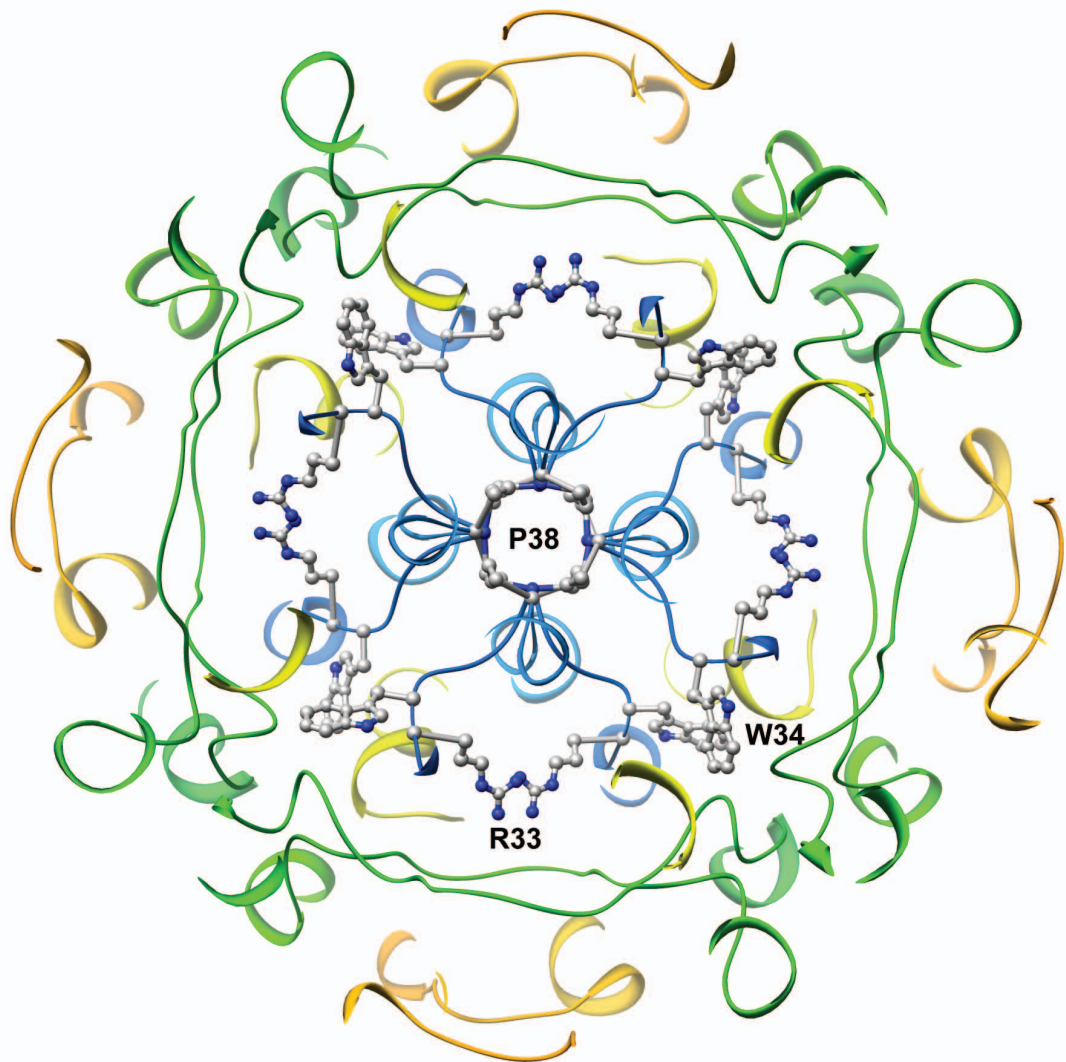

Supplement: 41586_2005_BFnature04321_MOESM4_ESM.pdf [file 41586_2005_BFnature04321_MOESM4_ESM.pdf]

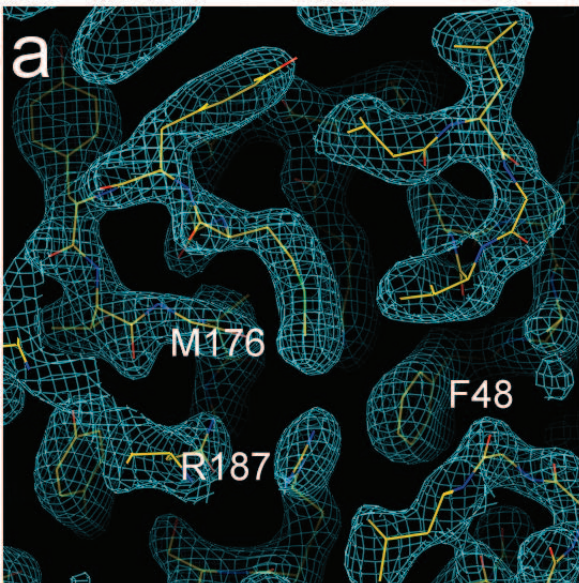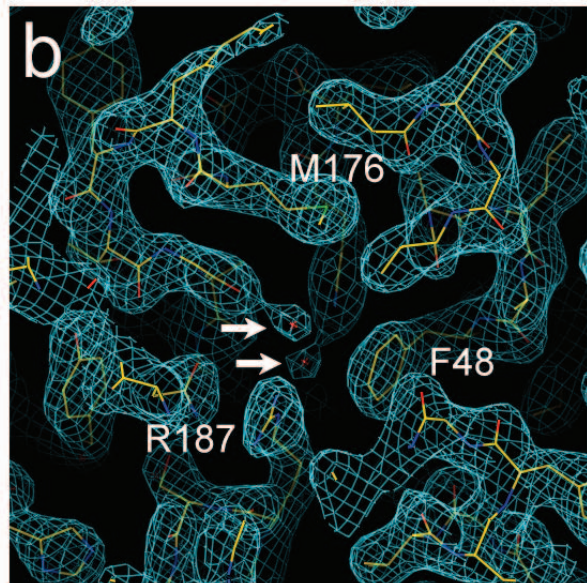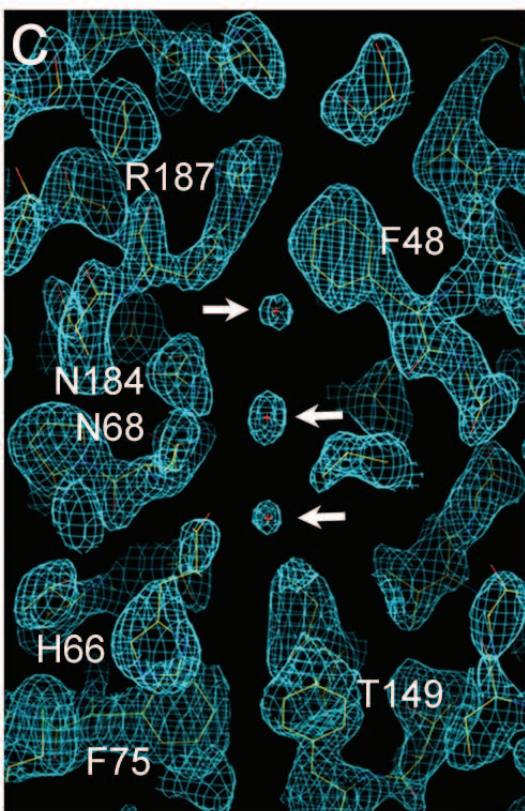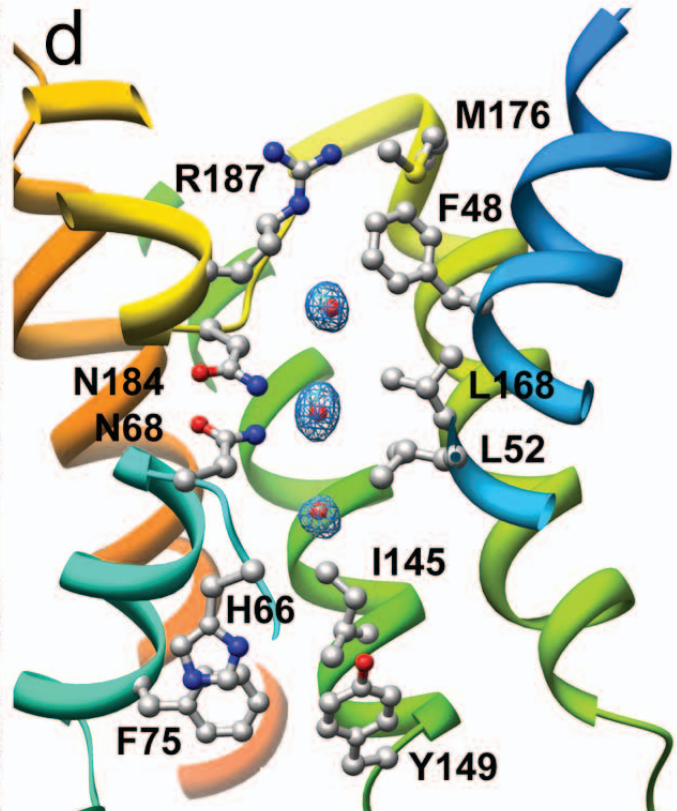

Supplement: 41586_2005_BFnature04321_MOESM5_ESM.pdf [file 41586_2005_BFnature04321_MOESM5_ESM.pdf]

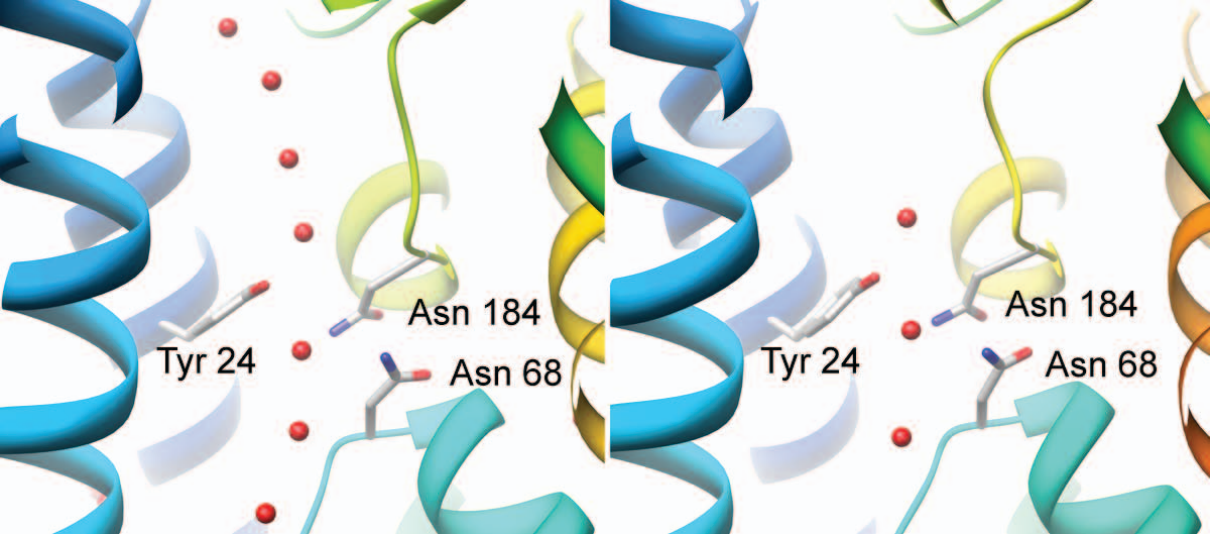

Supplement: 41586_2005_BFnature04321_MOESM6_ESM.pdf [file 41586_2005_BFnature04321_MOESM6_ESM.pdf]

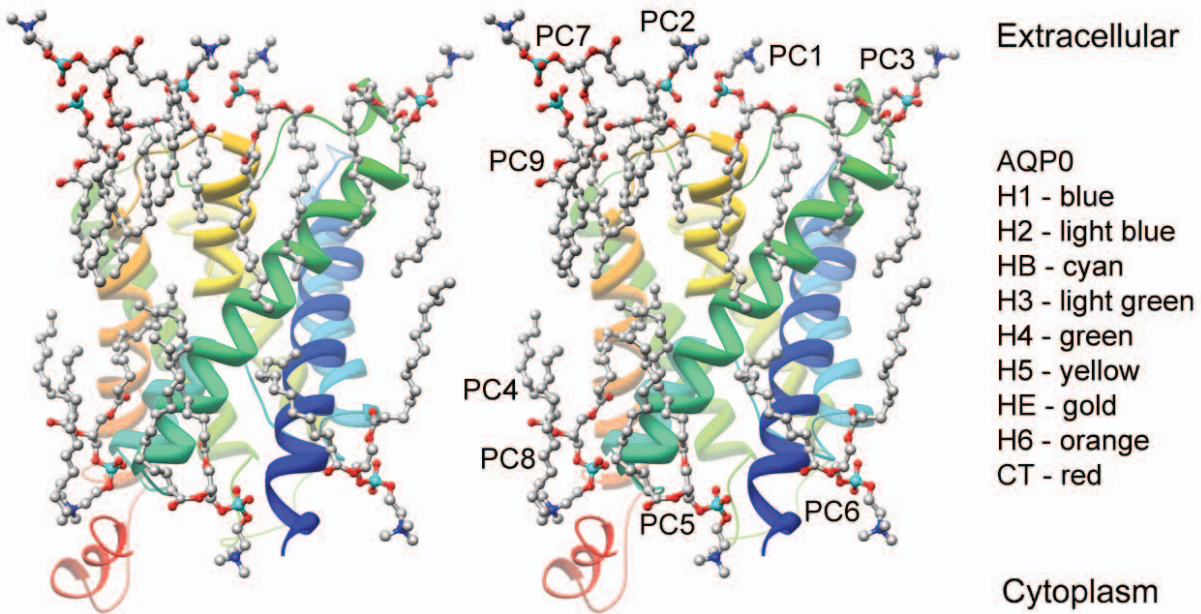

Supplement: 41586_2005_BFnature04321_MOESM7_ESM.pdf [file 41586_2005_BFnature04321_MOESM7_ESM.pdf]

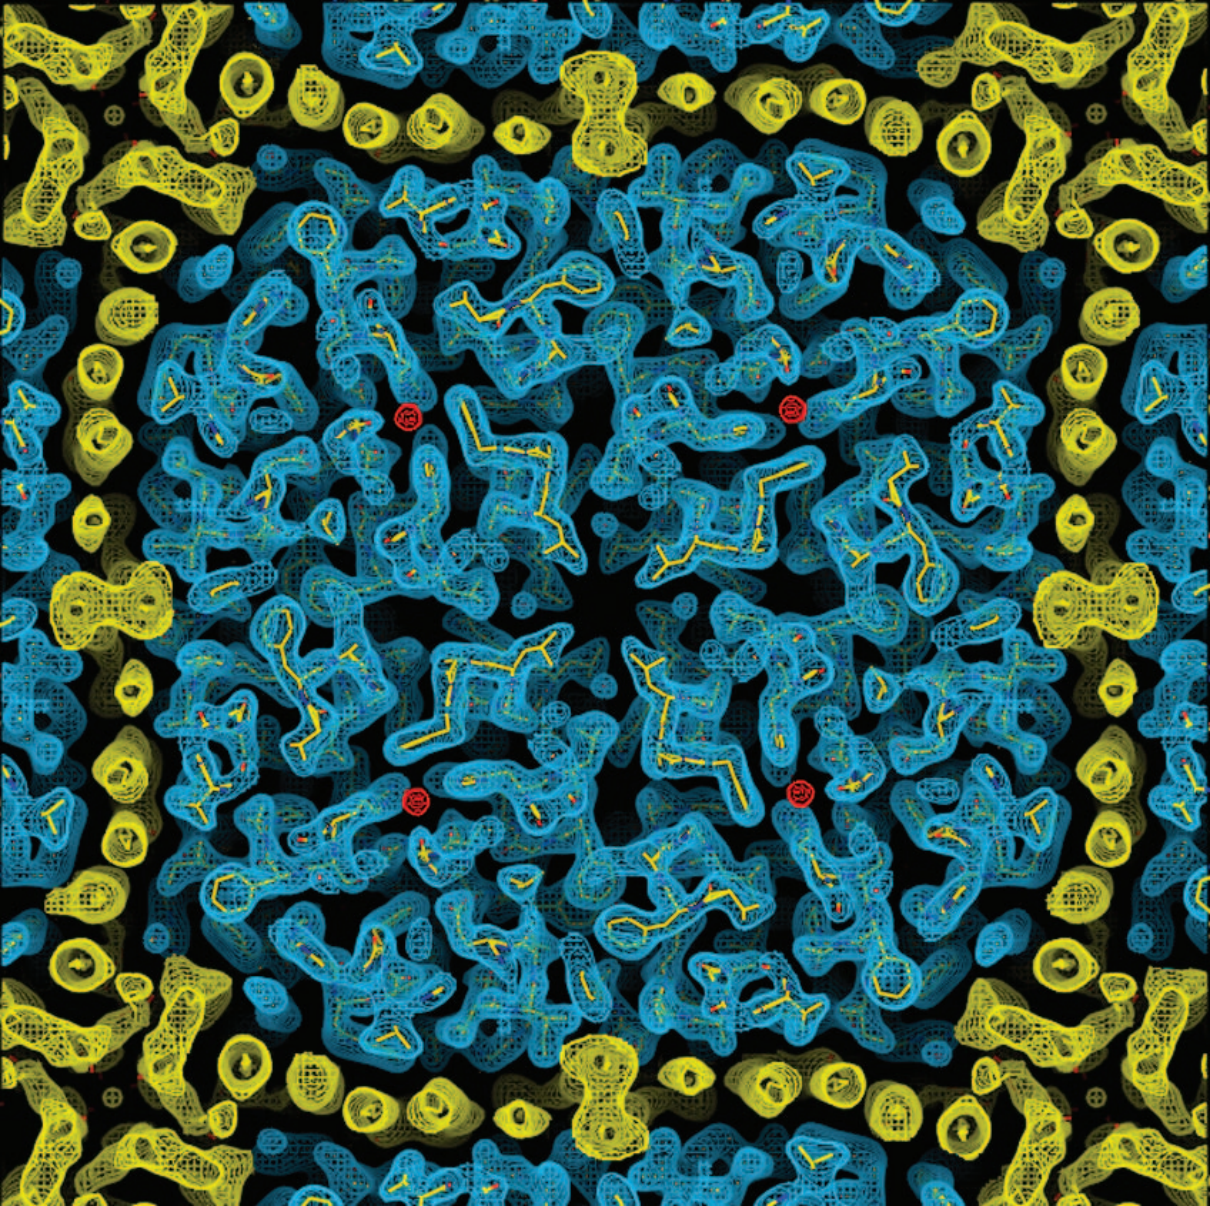

Supplement: 41586_2005_BFnature04321_MOESM8_ESM.pdf [file 41586_2005_BFnature04321_MOESM8_ESM.pdf]
